# Supplementary material for: Activity of Some Plant and Fungal Metabolites towards Aedes albopictus (Diptera, Culicidae)
Source: MDPI journal article supplement (doi:10.3390/toxins13040285), 2021-04-18
Supplement: s1 [file s1]

# Supplementary Materials: Activity of Some Plant and Fungal Metabolites Towards *Aedes albopictus* (Diptera, Culicidae)

Sonia Ganassi, Marco Masi, Pasqualina Grazioso, Antonio Evidente and Antonio De Cristofaro

**Table S1.** Larvicidal activity of  $\alpha$ -dihydrolycorine against *Ae. albopictus* first-instar larvae.

| Concentration<br>(ppm) | Mean mortality (%) $\pm$<br>SE |
|------------------------|--------------------------------|
|                        | 24 h                           |
| 100                    | 47.4 $\pm$ 1.6                 |
| 50                     | 46.5 $\pm$ 1.9                 |
| 25                     | 8.05 $\pm$ 1.9                 |
| 12.5                   | 2.0 $\pm$ 1.2                  |
| 6.25                   | 1.0 $\pm$ 1.0                  |
| 48 h                   |                                |
| 100                    | 46.8 $\pm$ 2.2                 |
| 50                     | 57.0 $\pm$ 4.6                 |
| 25                     | 9.0 $\pm$ 2.4                  |
| 12.5                   | 3.0 $\pm$ 1.2                  |
| 6.25                   | 2.0 $\pm$ 1.2                  |

Mean mortality percentages at 24 and 48 h post treatment, obtained in the bioassay to evaluate the effects of  $\alpha$ -dihydrolycorine on *Ae. albopictus* first-instar larvae.

**Table S2.** Larvicidal activity of 2-methoxy-1,4-naphthoquinone against *Ae. albopictus* third-instar larvae.

| Concentration<br>(ppm)          | Mean mortality (%) ±<br>SE<br>24 h |
|---------------------------------|------------------------------------|
| 100                             | 100 ± 0.0                          |
| 50                              | 5.0 ± 2.6                          |
| 25                              | 1.0 ± 1.0                          |
| 12.5                            | 0.0 ± 0.0                          |
| 6.25                            | 1.0 ± 1.0                          |
| Mean mortality (%) ± SE<br>48 h |                                    |
| 100                             | 100 ± 0.0                          |
| 50                              | 9.0 ± 3.1                          |
| 25                              | 1.0 ± 1.0                          |
| 12.5                            | 1.0 ± 1.0                          |
| 6.25                            | 1.0 ± 1.0                          |
| Mean mortality (%) ± SE<br>72 h |                                    |
| 100                             | 100 ± 0.0                          |
| 50                              | 30.0 ± 4.9                         |
| 25                              | 2.0 ± 1.4                          |
| 12.5                            | 1.0 ± 1.0                          |
| 6.25                            | 1.0 ± 1.0                          |

Mean mortality percentages at 24, 48 and 72 h post treatment, obtained in the bioassay to evaluate the effects of 2-methoxy-1,4-naphthoquinone on *Ae. albopictus* third-instar larvae.
